# Supplementary material
Source: Springer Nature journal article supplement (https://www.springermedizin.de/resource/supplementary/13075_2009_2761_MOESM4_ESM.pdf/9692826)

**A**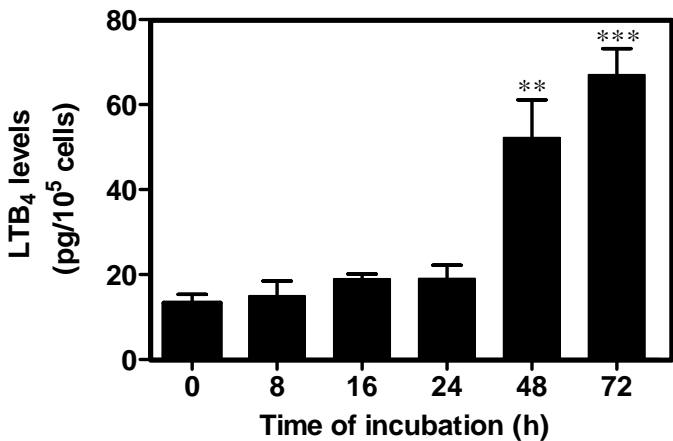**B**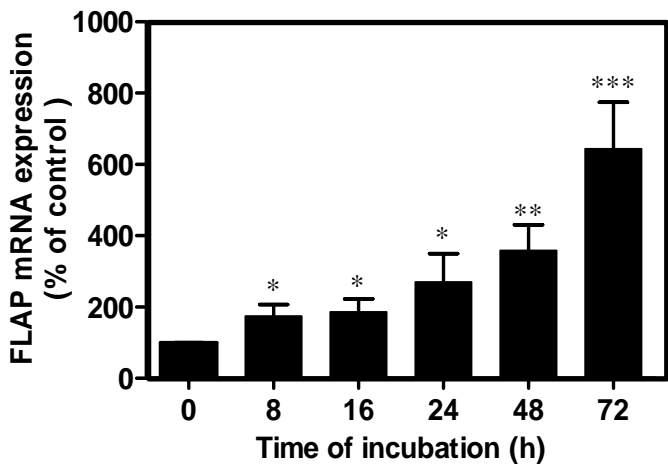**C**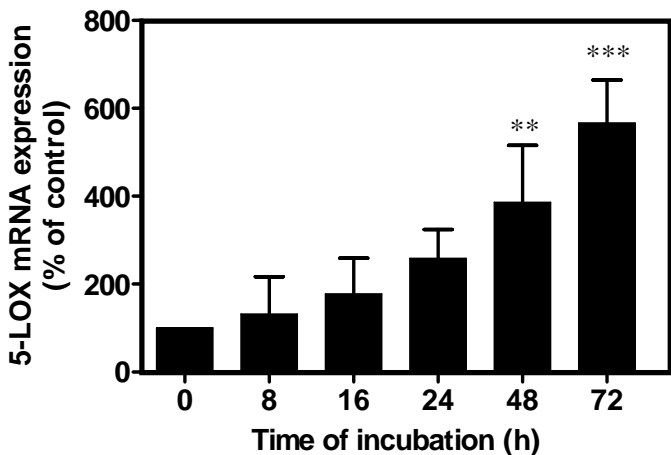

Supplement: MOESM4 [file 9692826]
